# Supplementary material for: Two Beta-Phosphorylamide Compounds as Ligands for Sm3+, Eu3+, and Tb3+: X-ray Crystallography and Luminescence Properties
Source: MDPI journal article supplement (doi:10.3390/molecules25132971), 2020-06-28

# checkCIF/PLATON report

Structure factors have been supplied for datablock(s) gvsu819h

THIS REPORT IS FOR GUIDANCE ONLY. IF USED AS PART OF A REVIEW PROCEDURE FOR PUBLICATION, IT SHOULD NOT REPLACE THE EXPERTISE OF AN EXPERIENCED CRYSTALLOGRAPHIC REFEREE.

No syntax errors found.      CIF dictionary      Interpreting this report

## Datablock: gvsu819h

---

Bond precision:    C-C = 0.0263 Å                      Wavelength=1.54178

Cell:                      a=18.2898(4)              b=18.2898(4)              c=27.4073(6)  
                            alpha=90              beta=90              gamma=90  
Temperature:              173 K

|                | Calculated                                | Reported                                  |
|----------------|-------------------------------------------|-------------------------------------------|
| Volume         | 9168.2(4)                                 | 9168.2(4)                                 |
| Space group    | P -4 21 c                                 | P -4 21 c                                 |
| Hall group     | P -4 2n                                   | P -4 2n                                   |
| Moiety formula | C62 H68 N8 O22 P4 Tb2, 2(N O3), 2(C H4 O) | C62 H68 N8 O22 P4 Tb2, 2(N O3), 2(C H4 O) |
| Sum formula    | C64 H76 N10 O30 P4 Tb2                    | C64 H76 N10 O30 P4 Tb2                    |
| Mr             | 1907.09                                   | 1907.06                                   |
| Dx, g cm-3     | 1.382                                     | 1.382                                     |
| Z              | 4                                         | 4                                         |
| Mu (mm-1)      | 8.794                                     | 8.794                                     |
| F000           | 3840.0                                    | 3840.0                                    |
| F000'          | 3783.58                                   |                                           |
| h,k,lmax       | 22,22,33                                  | 22,22,33                                  |
| Nref           | 8428[ 4594]                               | 8408                                      |
| Tmin,Tmax      | 0.182,0.200                               | 0.214,0.428                               |
| Tmin'          | 0.055                                     |                                           |

Correction method= # Reported T Limits: Tmin=0.214 Tmax=0.428  
AbsCorr = MULTI-SCAN

Data completeness= 1.83/1.00                      Theta(max)= 68.338

R(reflections)= 0.0638( 6739)                      wR2(reflections)= 0.2052( 8408)

S = 1.094                                      Npar= 536

---

```
test-name ALERT alert-type alert-level.
```

 Alert level A

**Author Response:** There is a minimal amount of electron density left in this structure; we propose that extensive hydrogen bonding network holding these compounds together also supports the relatively large void.

**Author Response:** This is a minimal number of outliers.

**Author Response: A TWIN refinement revealed no applicable TWIN laws.**

|                   |                                                  |       |          |       |       |
|-------------------|--------------------------------------------------|-------|----------|-------|-------|
| PLAT234_ALERT_4_C | Large Hirshfeld Difference C9                    | --C10 | .        | 0.22  | Ang.  |
| PLAT241_ALERT_2_C | High 'MainMol' Ueq as Compared to Neighbors of   |       |          | 05    | Check |
| PLAT241_ALERT_2_C | High 'MainMol' Ueq as Compared to Neighbors of   |       |          | C9    | Check |
| PLAT260_ALERT_2_C | Large Average Ueq of Residue Including           | O11   |          | 0.102 | Check |
| PLAT331_ALERT_2_C | Small Aver Phenyl C-C Dist C13A                  | -C18A | .        | 1.37  | Ang.  |
| PLAT918_ALERT_3_C | Reflection(s) with I(obs) much Smaller I(calc)   |       | .        | 2     | Check |
| PLAT976_ALERT_2_C | Check Calcd Resid. Dens.                         | 0.86A | From O1  | -0.41 | eA-3  |
| PLAT976_ALERT_2_C | Check Calcd Resid. Dens.                         | 0.63A | From O13 | -0.40 | eA-3  |
| PLAT978_ALERT_2_C | Number C-C Bonds with Positive Residual Density. |       |          | 0     | Info  |

|                   |                                                  |       |        |
|-------------------|--------------------------------------------------|-------|--------|
| PLAT002_ALERT_2_G | Number of Distance or Angle Restraints on AtSite | 20    | Note   |
| PLAT003_ALERT_2_G | Number of Uiso or Uij Restrained non-H Atoms ... | 18    | Report |
| PLAT007_ALERT_5_G | Number of Unrefined Donor-H Atoms .....          | 3     | Report |
| PLAT020_ALERT_3_G | The Value of Rint is Greater Than 0.12 .....     | 0.133 | Report |
| PLAT072_ALERT_2_G | SHELXL First Parameter in WGHT Unusually Large   | 0.13  | Report |
| PLAT171_ALERT_4_G | The CIF-Embedded .res File Contains EADP Records | 5     | Report |
| PLAT172_ALERT_4_G | The CIF-Embedded .res File Contains DFIX Records | 2     | Report |
| PLAT173_ALERT_4_G | The CIF-Embedded .res File Contains DANG Records | 2     | Report |
| PLAT174_ALERT_4_G | The CIF-Embedded .res File Contains FLAT Records | 1     | Report |
| PLAT175_ALERT_4_G | The CIF-Embedded .res File Contains SAME Records | 1     | Report |
| PLAT177_ALERT_4_G | The CIF-Embedded .res File Contains DELU Records | 3     | Report |
| PLAT178_ALERT_4_G | The CIF-Embedded .res File Contains SIMU Records | 3     | Report |
| PLAT301_ALERT_3_G | Main Residue Disorder .....(Resd 1 )             | 14%   | Note   |
| PLAT432_ALERT_2_G | Short Inter X...Y Contact O11 ..C17A             | 2.92  | Ang.   |
|                   | 1/2-x,-1/2+y,3/2-z =                             | 5.546 | Check  |

```

PLAT432_ALERT_2_G Short Inter X...Y Contact  O11      ..C18A      3.02 Ang.
                                1/2-x,-1/2+y,3/2-z  =      5_546 Check
PLAT720_ALERT_4_G Number of Unusual/Non-Standard Labels ..... 10 Note
PLAT794_ALERT_5_G Tentative Bond Valency for Tb1      (III)      . 3.52 Info
PLAT860_ALERT_3_G Number of Least-Squares Restraints ..... 165 Note
PLAT912_ALERT_4_G Missing # of FCF Reflections Above STh/L= 0.600 2 Note

```

---

```

1 ALERT level A = Most likely a serious problem - resolve or explain
3 ALERT level B = A potentially serious problem, consider carefully
10 ALERT level C = Check. Ensure it is not caused by an omission or oversight
19 ALERT level G = General information/check it is not something unexpected

1 ALERT type 1 CIF construction/syntax error, inconsistent or missing data
13 ALERT type 2 Indicator that the structure model may be wrong or deficient
7 ALERT type 3 Indicator that the structure quality may be low
10 ALERT type 4 Improvement, methodology, query or suggestion
2 ALERT type 5 Informative message, check

```

---

It is advisable to attempt to resolve as many as possible of the alerts in all categories. Often the minor alerts point to easily fixed oversights, errors and omissions in your CIF or refinement strategy, so attention to these fine details can be worthwhile. In order to resolve some of the more serious problems it may be necessary to carry out additional measurements or structure refinements. However, the purpose of your study may justify the reported deviations and the more serious of these should normally be commented upon in the discussion or experimental section of a paper or in the "special\_details" fields of the CIF. checkCIF was carefully designed to identify outliers and unusual parameters, but every test has its limitations and alerts that are not important in a particular case may appear. Conversely, the absence of alerts does not guarantee there are no aspects of the results needing attention. It is up to the individual to critically assess their own results and, if necessary, seek expert advice.

### Publication of your CIF in IUCr journals

A basic structural check has been run on your CIF. These basic checks will be run on all CIFs submitted for publication in IUCr journals (*Acta Crystallographica*, *Journal of Applied Crystallography*, *Journal of Synchrotron Radiation*); however, if you intend to submit to *Acta Crystallographica Section C* or *E* or *IUCrData*, you should make sure that full publication checks are run on the final version of your CIF prior to submission.

### Publication of your CIF in other journals

Please refer to the *Notes for Authors* of the relevant journal for any special instructions relating to CIF submission.

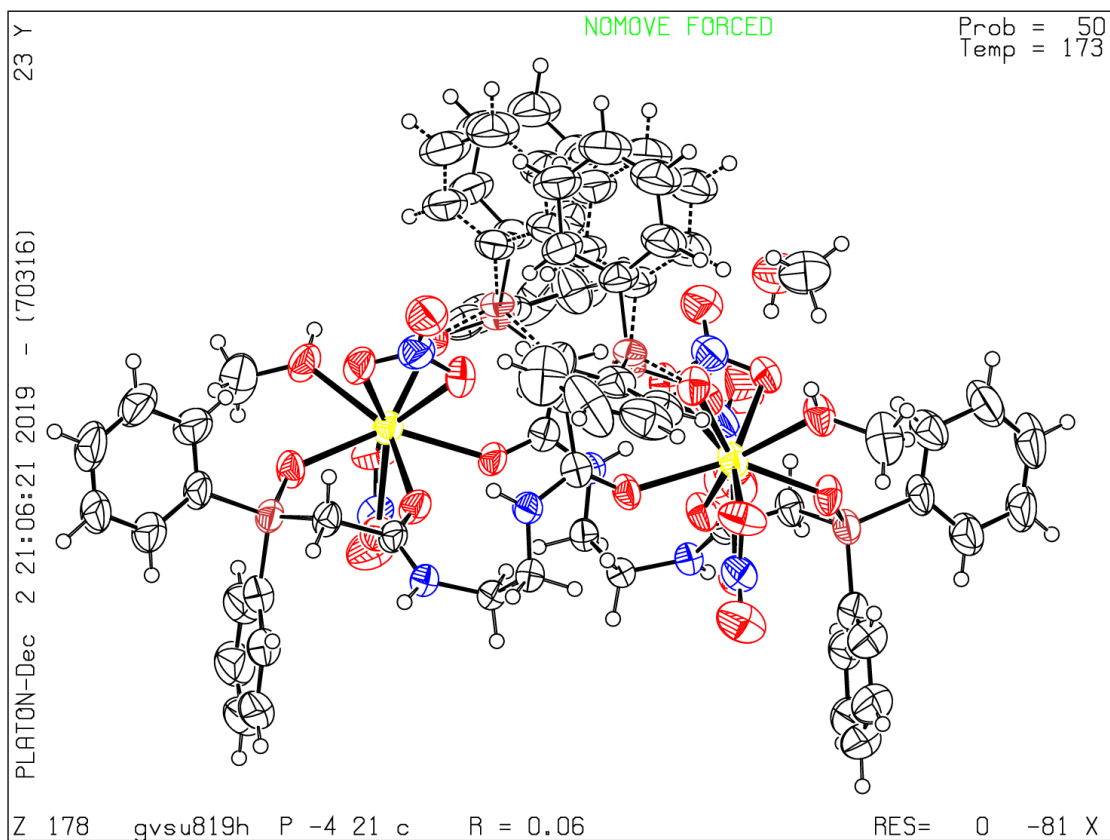

Supplement: s1 [file s1]
